# Supplementary material
Source: ML conference proceedings conference paper supplement (https://openaccess.thecvf.com/content/ICCV2023/html/He_BiViT_Extremely_Compressed_ICCV_2023_paper.html)
Supplement: Supplementary file 1 [file He_BiViT_Extremely_Compressed_ICCV_2023_supplemental.pdf]

# BiViT: Extremely Compressed Binary Vision Transformers

## Supplementary Material

Yefei He<sup>1</sup>   Zhenyu Lou<sup>1</sup>   Luoming Zhang<sup>1</sup>   Jing Liu<sup>2</sup>   Weijia Wu<sup>1</sup>  
Hong Zhou<sup>1†</sup>   Bohan Zhuang<sup>2†</sup>

<sup>1</sup>Zhejiang University, China

<sup>2</sup>ZIP Lab, Monash University, Australia

### A. More experimental results on COCO

In this section, we present additional experimental results of BiViT on the COCO 2017 validation set. As shown in Table A, our method outperforms the competitive BiBERT by a large margin in all metrics.

Table A. Comparisons of different methods and backbones on COCO 2017 validation set.

| Framework          | Method | Task                  | AP          | AP <sub>50</sub> | AP <sub>75</sub> | AP <sub>S</sub> | AP <sub>M</sub> | AP <sub>L</sub> |
|--------------------|--------|-----------------------|-------------|------------------|------------------|-----------------|-----------------|-----------------|
| Mask R-CNN         | FP     | Object Detection      | 43.7        | 66.6             | 47.7             | 28.5            | 47.0            | 57.3            |
|                    | BiBERT |                       | 32.0        | 53.9             | 33.7             | 19.6            | 34.1            | 41.3            |
|                    | Ours   |                       | <b>33.4</b> | <b>55.0</b>      | <b>35.2</b>      | <b>20.8</b>     | <b>35.6</b>     | <b>42.0</b>     |
|                    | FP     | Instance Segmentation | 39.8        | 63.3             | 42.7             | 24.2            | 43.1            | 54.6            |
|                    | BiBERT |                       | 30.4        | 51.0             | 31.9             | 16.7            | 32.5            | 41.4            |
|                    | Ours   |                       | <b>31.6</b> | <b>51.7</b>      | <b>33.4</b>      | <b>18.3</b>     | <b>34.0</b>     | <b>42.1</b>     |
| Cascade Mask R-CNN | FP     | Object Detection      | 48.1        | 67.1             | 52.2             | 30.4            | 51.5            | 63.1            |
|                    | BiBERT |                       | 39.2        | 57.3             | 42.5             | 23.7            | 41.3            | 51.1            |
|                    | Ours   |                       | <b>40.8</b> | <b>59.2</b>      | <b>44.1</b>      | <b>25.2</b>     | <b>43.3</b>     | <b>52.8</b>     |
|                    | FP     | Instance Segmentation | 41.7        | 64.4             | 45.0             | 41.7            | 64.4            | 45.0            |
|                    | BiBERT |                       | 34.5        | 54.5             | 36.8             | 19.1            | 36.5            | 46.6            |
|                    | Ours   |                       | <b>35.7</b> | <b>56.5</b>      | <b>38.2</b>      | <b>20.1</b>     | <b>38.2</b>     | <b>48.5</b>     |

<sup>†</sup>H. Zhou and B. Zhuang are corresponding authors.
